# Supplementary material
Source: Springer Nature journal article supplement (https://www.springermedizin.de/resource/supplementary/12936_2010_1754_MOESM2_ESM.pdf/9541670)
Supplement: MOESM2 [file 9541670]

Percentage of cases

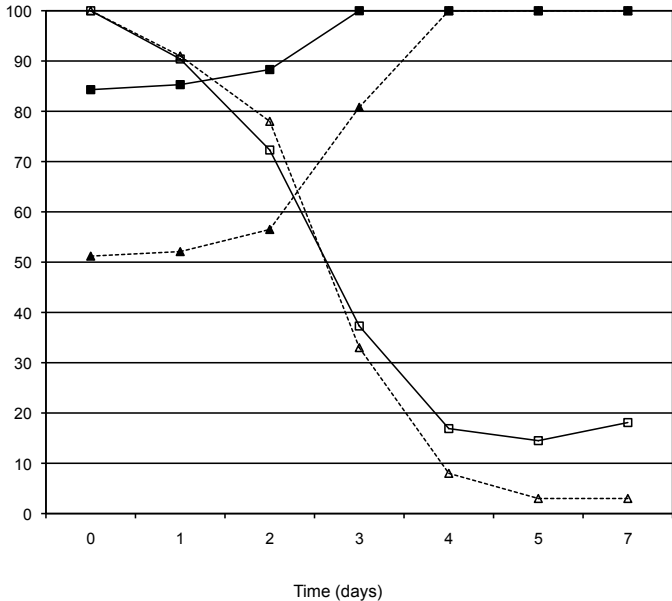

■ % positive who will fail, CQ 25 mg/kg

▲ % positive who will fail, CQ 40 mg/kg

□ % positive, CQ 25 mg/kg

△ % positive, CQ 40 mg/kg

Time (days)
